# Supplementary material for: Management of urticarial vasculitis: A worldwide physician perspective
Source: PubMed Central journal article supplement — World Allergy Organ J. 2020 Mar 5;13(3):100107. doi: 10.1016/j.waojou.2020.100107 (PMC7063238; doi:10.1016/j.waojou.2020.100107), 2020-03-05
Supplement: mmc1.pdf [file mmc1.pdf]

**Suppl. Figure 1. The online survey on Management of urticarial vasculitis: A worldwide perspective**

**1 Your country of residence:**

Please choose only one of the following:

|                          |                                   |                  |
|--------------------------|-----------------------------------|------------------|
| Afghanistan              | Comoros                           | Haiti            |
| Algeria                  | Congo, Democratic Republic of the | Honduras         |
| American Samoa           | Congo, Republic of the            | Hong Kong        |
| Andorra                  | Costa Rica                        | Hungary          |
| Angola                   | Côte d'Ivoire                     | Iceland          |
| Antigua and Barbuda      | Croatia                           | India            |
| Argentina                | Cuba                              | Indonesia        |
| Armenia                  | Cyprus                            | Iran             |
| Australia                | Czech Republic                    | Iraq             |
| Austria                  | Denmark                           | Ireland          |
| Azerbaijan               | Djibouti                          | Israel           |
| Bahamas                  | Dominica                          | Italy            |
| Bahrain                  | Dominican Republic                | Jamaica          |
| Bangladesh               | East Timor                        | Japan            |
| Barbados                 | Ecuador                           | Jordan           |
| Belarus                  | Egypt                             | Kazakhstan       |
| Belgium                  | El Salvador                       | Kenya            |
| Belize                   | Equatorial Guinea                 | Kiribati         |
| Benin                    | Eritrea                           | North Korea      |
| Bermuda                  | Estonia                           | South Korea      |
| Bhutan                   | Ethiopia                          | Kosovo           |
| Bolivia                  | Faroe Islands                     | Kuwait           |
| Bosnia and Herzegovina   | Fiji                              | Kyrgyzstan       |
| Botswana                 | Finland                           | Laos             |
| Brazil                   | France                            | Latvia           |
| Brunei                   | French Polynesia                  | Lebanon          |
| Bulgaria                 | Gabon                             | Lesotho          |
| Burkina Faso             | Gambia                            | Liberia          |
| Burundi                  | Georgia                           | Libya            |
| Cambodia                 | Germany                           | Liechtenstein    |
| Cameroon                 | Ghana                             | Lithuania        |
| Canada                   | Greece                            | Luxembourg       |
| Cape Verde               | Greenland                         | Macedonia        |
| Cayman Islands           | Grenada                           | Madagascar       |
| Central African Republic | Guam                              | Malawi           |
| Chad                     | Guatemala                         | Malaysia         |
| Chile                    | Guinea                            | Maldives         |
| China                    | Guinea-Bissau                     | Mali             |
| Colombia                 | Guyana                            | Malta            |
|                          |                                   | Marshall Islands |
|                          |                                   | Mauritania       |

|                                     |                         |
|-------------------------------------|-------------------------|
| Mauritius                           | Serbia                  |
| Mexico                              | Seychelles              |
| Micronesia                          | Sierra Leone            |
| Moldova                             | Singapore               |
| Monaco                              | Sint Maarten            |
| Mongolia                            | Slovakia                |
| Montenegro                          | Slovenia                |
| Morocco                             | Solomon Islands         |
| Mozambique                          | Somalia                 |
| Myanmar                             | South Africa            |
| Namibia                             | Spain                   |
| Nauru                               | Sri Lanka               |
| Nepal                               | Sudan                   |
| Netherlands                         | Sudan, South            |
| New Zealand                         | Suriname                |
| Nicaragua                           | Swaziland               |
| Niger                               | Sweden                  |
| Nigeria                             | Switzerland             |
| Northern Mariana<br>Islands         | Syria                   |
| Norway                              | Taiwan                  |
| Oman                                | Tajikistan              |
| Pakistan                            | Tanzania                |
| Palau                               | Thailand                |
| Palestine, State of                 | Togo                    |
| Panama                              | Tonga                   |
| Papua New Guinea                    | Trinidad and Tobago     |
| Paraguay                            | Tunisia                 |
| Peru                                | Turkey                  |
| Philippines                         | Turkmenistan            |
| Poland                              | Tuvalu                  |
| Portugal                            | Uganda                  |
| Puerto Rico                         | Ukraine                 |
| Qatar                               | United Arab Emirates    |
| Romania                             | United Kingdom          |
| Russia                              | United States           |
| Rwanda                              | Uruguay                 |
| Saint Kitts and Nevis               | Uzbekistan              |
| Saint Lucia                         | Vanuatu                 |
| Saint Vincent and the<br>Grenadines | Vatican City            |
| Samoa                               | Venezuela               |
| San Marino                          | Vietnam                 |
| Sao Tome and<br>Principe            | Virgin Islands, British |
| Saudi Arabia                        | Virgin Islands, U.S.    |
| Senegal                             | Yemen                   |
|                                     | Zambia                  |
|                                     | Zimbabwe                |

**2 Your specialty** (Please choose all that apply):

- Allergy/Immunology
- Dermatology
- Paediatrics
- Rheumatology
- General practice
- Other (please specify): \_\_\_\_\_

**3 How long have you been practicing in your specialty? (years):**

\_\_\_\_\_

**4 Your work environment** (Please choose all that apply):

- Private practice
- University clinic
- Hospital
- Specialized urticaria centre
- Other (please specify): \_\_\_\_\_

**5 How many Urticarial Vasculitis (UV) patients do you see per year?** (Only numbers allowed): \_\_\_\_\_

**6 Is the diagnosis of UV already established in most patients or do you diagnose these patients?** Please choose only one of the following:

- The diagnosis of UV is already established in most patients
- I diagnose most patients

**7 What are the reasons that patients with UV are referred to your institution?**

(Please choose all that apply):

- Establish a diagnosis
- Second opinion
- Treatment initiation
- Treatment optimization
- Clinical/basic research
- Other (please specify): \_\_\_\_\_

**8 In how many of your UV patients do you observe the following cutaneous symptoms at any timepoint?**

|                           | No                       | ≤20%                     | ≤40%                     | ≤60%                     | ≤80%                     | <100%                    | All                      |
|---------------------------|--------------------------|--------------------------|--------------------------|--------------------------|--------------------------|--------------------------|--------------------------|
| Wheals                    | <input type="checkbox"/> |
| Angioedema                | <input type="checkbox"/> |
| Itch                      | <input type="checkbox"/> |
| Burning                   | <input type="checkbox"/> |
| Localized pain            | <input type="checkbox"/> |
| Resolving of lesions with | <input type="checkbox"/> |

hyperpigmentation

Other (please specify)\_\_\_\_\_

**9 In how many of your UV patients do you see the following extracutaneous symptoms at any timepoint?**

|                                                                                | No                       | ≤20%                     | ≤40%                     | ≤60%                     | ≤80%                     | <100%                    | All                      |
|--------------------------------------------------------------------------------|--------------------------|--------------------------|--------------------------|--------------------------|--------------------------|--------------------------|--------------------------|
| Constitutional symptoms (e.g. fatigue, asthenia, fever)                        | <input type="checkbox"/> |
| Musculoskeletal involvement (e.g. arthralgia, arthritis)                       | <input type="checkbox"/> |
| Ocular involvement (e.g. scleritis, uveitis)                                   | <input type="checkbox"/> |
| Lymph node enlargement                                                         | <input type="checkbox"/> |
| Pulmonary involvement (e.g. COPD, dyspnea)                                     | <input type="checkbox"/> |
| GI involvement (e.g. pain, diarrhea, nausea)                                   | <input type="checkbox"/> |
| Kidney involvement (e.g. glomerular/tubulointerstitial nephritis)              | <input type="checkbox"/> |
| Ear, nose, and throat involvement (e.g. sinusitis, otitis media, hearing loss) | <input type="checkbox"/> |
| Neurologic involvement                                                         | <input type="checkbox"/> |
| Pericarditis                                                                   | <input type="checkbox"/> |
| Other (please specify)_____                                                    | <input type="checkbox"/> |

**10 How do you diagnose UV?** Please choose only the three most important signs and/or symptoms that apply:

- Wheals predominantly >24h
- Presence of post-inflammatory hyperpigmentation

- Systemic symptoms (e.g. fever, arthralgia, abdominal pain)
- Presence of underlying disease (e.g. malignancy, SLE)
- Histological analysis
- Low complement levels
- High levels of inflammation markers, e.g. ESR, CRP
- Poor response to antihistamines
- Other (please specify)\_\_\_\_\_

**11 Which of the following tests do you order or perform in UV patients? Please choose all that apply:**

|                                                                   | No                       | ≤20%                     | ≤40%                     | ≤60%                     | ≤80%                     | <100%                    | All patients             |
|-------------------------------------------------------------------|--------------------------|--------------------------|--------------------------|--------------------------|--------------------------|--------------------------|--------------------------|
| Skin biopsy                                                       | <input type="checkbox"/> |
| Complete blood count                                              | <input type="checkbox"/> |
| Erythrocyte sedimentation rate                                    | <input type="checkbox"/> |
| C-reactive protein                                                | <input type="checkbox"/> |
| Anti-thyroid antibodies                                           | <input type="checkbox"/> |
| Complement component (C3, C4, C1q, CH50)                          | <input type="checkbox"/> |
| Thyroid stimulating hormone                                       | <input type="checkbox"/> |
| Eosinophil cationic protein                                       | <input type="checkbox"/> |
| D-dimer                                                           | <input type="checkbox"/> |
| Serological testing for hepatitis                                 | <input type="checkbox"/> |
| Search for malignancies                                           | <input type="checkbox"/> |
| Search for allergy (skin tests, allergen-specific IgE, total IgE) | <input type="checkbox"/> |
| Antinuclear antibodies                                            | <input type="checkbox"/> |
| Autologous serum skin test                                        | <input type="checkbox"/> |
| Specific autoantibodies*                                          | <input type="checkbox"/> |
| None                                                              | <input type="checkbox"/> |

Other (please specify)\_\_\_\_\_

\*e.g. anti-SSA/B, anti-dsDNA, anti-RNP, anti-SM, anti-C1q, ANCAs

**12 What comorbidities/potential causes of UV do you see in your patients?**

|                                                  | None                     | ≤20%                     | ≤40%                     | ≤60%                     | ≤80%                     | <100%                    | Always                   |
|--------------------------------------------------|--------------------------|--------------------------|--------------------------|--------------------------|--------------------------|--------------------------|--------------------------|
| Idiopathic UV                                    | <input type="checkbox"/> |
| Malignancy                                       | <input type="checkbox"/> |
| Systemic lupus erythematosus                     | <input type="checkbox"/> |
| Other autoimmune diseases                        | <input type="checkbox"/> |
| Hepatitis C                                      | <input type="checkbox"/> |
| Other chronic infections                         | <input type="checkbox"/> |
| Drugs                                            | <input type="checkbox"/> |
| I don't usually look for underlying causes of UV | <input type="checkbox"/> |
| Other (please specify)_____                      | <input type="checkbox"/> |

**13 Which of the following medications do you use in UV? Please choose all that apply:**

|                                                                           | 1 <sup>st</sup> line     | 2 <sup>nd</sup> line     | 3 <sup>rd</sup> line     | ≥4 <sup>th</sup> line    | Do not use               |
|---------------------------------------------------------------------------|--------------------------|--------------------------|--------------------------|--------------------------|--------------------------|
| First-generation H1-antihistamines                                        | <input type="checkbox"/> |
| Second-generation H1-antihistamines at standard dose                      | <input type="checkbox"/> |
| Updosed second-generation H1-antihistamines (2-4 times the standard dose) | <input type="checkbox"/> |
| H2-antihistamines (e.g. famotidine or ranitidine)                         | <input type="checkbox"/> |

|                             |                          |                          |                          |                          |                          |
|-----------------------------|--------------------------|--------------------------|--------------------------|--------------------------|--------------------------|
| Cyclosporine                | <input type="checkbox"/> |
| Omalizumab                  | <input type="checkbox"/> |
| Montelukast                 | <input type="checkbox"/> |
| NSAIDs                      | <input type="checkbox"/> |
| Glucocorticosteroids        | <input type="checkbox"/> |
| Azathioprine                | <input type="checkbox"/> |
| Methotrexate                | <input type="checkbox"/> |
| Rituximab                   | <input type="checkbox"/> |
| Anakinra                    | <input type="checkbox"/> |
| Canakinumab                 | <input type="checkbox"/> |
| Mycophenolate mofetil       | <input type="checkbox"/> |
| Intravenous immunoglobulin  | <input type="checkbox"/> |
| Dapsone                     | <input type="checkbox"/> |
| Colchicine                  | <input type="checkbox"/> |
| Hydroxychloroquine          | <input type="checkbox"/> |
| Pentoxifylline              | <input type="checkbox"/> |
| Plasmapheresis              | <input type="checkbox"/> |
| Other (please specify)_____ | <input type="checkbox"/> |

**14 What is(are) your greatest challenge(s) in managing UV patients? (please choose all that apply)**

- No clinical guidelines and treatment algorithms exist
- Clinical diagnostic criteria are not clear
- Histological diagnostic criteria are not clear
- Many drugs have limited efficacy
- Many drugs have potentially serious adverse effects
- Often severe and difficult-to-treat disease
- Need for help from other specialists, especially in the case of underlying disease
- Novel treatment is not available or costs too high in my country of residence
- I don't have enough clinical experience in the management of UV
- It is difficult to find an underlying diseases (a cause of UV is usually unknown)
- Other (please specify): \_\_\_\_\_

**Thank you for taking your time to participate in our survey! You helped to change the future of the management of urticarial vasculitis patients!**

**If you have comments or suggestions for us, please provide them here:**

---

**Thank you very much for your participation!**
