# Supplementary material for: Management of urticarial vasculitis: A worldwide physician perspective
Source: PubMed Central journal article supplement — World Allergy Organ J. 2020 Mar 5;13(3):100107. doi: 10.1016/j.waojou.2020.100107 (PMC7063238; doi:10.1016/j.waojou.2020.100107), 2020-03-05
Supplement: mmc2.pdf [file mmc2.pdf]

**Suppl. Table 1.** A geographical distribution of the respondents participating in the survey (n=883)

| North America<br>(n=167, 18.9%)                                             | Latin America<br>(n=165, 18.7%)                                                                                                                                                                                    | Europe<br>(n=408, 46.2%)                                                                                                                                                                                                                                                                                                                                                                                                                                  | Africa/Middle-<br>East<br>(n=34, 3.8%)                                                                                              | Asia-Pacific<br>(n=109, 12.4%)                                                                                                                                                                                                     |
|-----------------------------------------------------------------------------|--------------------------------------------------------------------------------------------------------------------------------------------------------------------------------------------------------------------|-----------------------------------------------------------------------------------------------------------------------------------------------------------------------------------------------------------------------------------------------------------------------------------------------------------------------------------------------------------------------------------------------------------------------------------------------------------|-------------------------------------------------------------------------------------------------------------------------------------|------------------------------------------------------------------------------------------------------------------------------------------------------------------------------------------------------------------------------------|
| Antigua and Barbuda<br>Canada<br>United States<br>US Minor Outlying Islands | Argentina<br>Bolivia<br>Brazil<br>Chile<br>Colombia<br>Costa Rica<br>Cuba<br>Dominican Republic<br>Ecuador<br>El Salvador<br>Guatemala<br>Honduras<br>Mexico<br>Panama<br>Paraguay<br>Peru<br>Uruguay<br>Venezuela | Albania<br>Andorra<br>Armenia<br>Austria<br>Azerbaijan<br>Belarus<br>Belgium<br>Bulgaria<br>Croatia<br>Czech Republic<br>Denmark<br>Finland<br>France<br>Georgia<br>Germany<br>Greece<br>Hungary<br>Ireland<br>Italy<br>Kosovo<br>Latvia<br>Malta<br>Moldova<br>Montenegro<br>Netherlands<br>Norway<br>Poland<br>Portugal<br>Romania<br>Russia<br>Serbia<br>Slovakia<br>Slovenia<br>Spain<br>Sweden<br>Switzerland<br>Turkey<br>Ukraine<br>United Kingdom | Algeria<br>Cyprus<br>Egypt<br>Iran<br>Iraq<br>Israel<br>Lebanon<br>Morocco<br>Sudan<br>Qatar<br>South Africa<br>Tunisia<br>Zimbabwe | Australia<br>Bangladesh<br>India<br>Indonesia<br>Japan<br>Jordan<br>Korea<br>Mongolia<br>New Zealand<br>Pakistan<br>Philippines<br>Pitcairn<br>Saudi Arabia<br>Singapore<br>Taiwan<br>Thailand<br>United Arab Emirates<br>Viet Nam |

**Suppl. Table 2. Geographical distribution of the respondents (n=883)**

| <b>Country</b>     | <b>% of respondents</b> | <b>n of respondents</b> |
|--------------------|-------------------------|-------------------------|
| United States      | 17.55                   | 155                     |
| Turkey             | 14.95                   | 132                     |
| Brazil             | 6.91                    | 61                      |
| Germany            | 4.19                    | 37                      |
| Italy              | 4.08                    | 36                      |
| Mexico             | 3.85                    | 34                      |
| United Kingdom     | 3.40                    | 30                      |
| Romania            | 2.72                    | 24                      |
| India              | 2.60                    | 23                      |
| Russia             | 2.27                    | 20                      |
| Australia          | 1.93                    | 17                      |
| Argentina          | 1.81                    | 16                      |
| Colombia           | 1.81                    | 16                      |
| Portugal           | 1.59                    | 14                      |
| Greece             | 1.47                    | 13                      |
| Philippines        | 1.47                    | 13                      |
| Albania            | 1.25                    | 11                      |
| Spain              | 1.25                    | 11                      |
| Canada             | 1.13                    | 10                      |
| Chile              | 1.13                    | 10                      |
| Korea              | 1.13                    | 10                      |
| Netherlands        | 1.13                    | 10                      |
| Japan              | 1.02                    | 9                       |
| Egypt              | 0.91                    | 8                       |
| Thailand           | 0.91                    | 8                       |
| Iran               | 0.68                    | 6                       |
| Switzerland        | 0.68                    | 6                       |
| Bulgaria           | 0.57                    | 5                       |
| Hungary            | 0.57                    | 5                       |
| Indonesia          | 0.57                    | 5                       |
| Peru               | 0.57                    | 5                       |
| Sweden             | 0.57                    | 5                       |
| Serbia             | 0.57                    | 5                       |
| Czech Republic     | 0.45                    | 4                       |
| Ecuador            | 0.45                    | 4                       |
| Pakistan           | 0.45                    | 4                       |
| Venezuela          | 0.45                    | 4                       |
| Austria            | 0.34                    | 3                       |
| Azerbaijan         | 0.34                    | 3                       |
| Belarus            | 0.34                    | 3                       |
| Dominican Republic | 0.34                    | 3                       |
| France             | 0.34                    | 3                       |
| Georgia            | 0.34                    | 3                       |
| Israel             | 0.34                    | 3                       |

|                      |      |   |
|----------------------|------|---|
| Lebanon              | 0.34 | 3 |
| Paraguay             | 0.34 | 3 |
| Saudi Arabia         | 0.34 | 3 |
| South Africa         | 0.34 | 3 |
| Taiwan               | 0.34 | 3 |
| Viet Nam             | 0.34 | 3 |
| United Arab Emirates | 0.34 | 3 |
| Armenia              | 0.23 | 2 |
| Denmark              | 0.23 | 2 |
| Finland              | 0.23 | 2 |
| Honduras             | 0.23 | 2 |
| Iraq                 | 0.23 | 2 |
| Jordan               | 0.23 | 2 |
| Latvia               | 0.23 | 2 |
| New Zealand          | 0.23 | 2 |
| Poland               | 0.23 | 2 |
| Slovakia             | 0.23 | 2 |
| Slovenia             | 0.23 | 2 |
| Zimbabwe             | 0.23 | 2 |
| Tunisia              | 0.23 | 2 |
| Ukraine              | 0.23 | 2 |
| Algeria              | 0.11 | 1 |
| Andorra              | 0.11 | 1 |
| Antigua and Barbuda  | 0.11 | 1 |
| Bangladesh           | 0.11 | 1 |
| Belgium              | 0.11 | 1 |
| Bolivia              | 0.11 | 1 |
| Costa Rica           | 0.11 | 1 |
| Croatia              | 0.11 | 1 |
| Cuba                 | 0.11 | 1 |
| Cyprus               | 0.11 | 1 |
| El Salvador          | 0.11 | 1 |
| Guatemala            | 0.11 | 1 |
| Ireland              | 0.11 | 1 |
| Kosovo               | 0.11 | 1 |
| Malta                | 0.11 | 1 |
| Moldova              | 0.11 | 1 |
| Mongolia             | 0.11 | 1 |
| Montenegro           | 0.11 | 1 |
| Morocco              | 0.11 | 1 |
| Norway               | 0.11 | 1 |
| Qatar                | 0.11 | 1 |
| Panama               | 0.11 | 1 |
| Pitcairn             | 0.11 | 1 |
| Singapore            | 0.11 | 1 |
| Sudan                | 0.11 | 1 |
| Uruguay              | 0.11 | 1 |
| US Minor Outlying    | 0.11 | 1 |

Islands
